# Supplementary material for: A new rapid multicomponent domino reaction for the formation of functionalized benzo[h]pyrazolo[3,4-b]quinolines
Source: Royal Society of Chemistry journal article supplement (doi:10.1039/c1ob05034f), 2011-01-01
Supplement: c1ob05034f.pdf [file c1ob05034f.pdf]

# A new rapid multicomponent domino reaction for the formation of functionalized benzo[*h*]pyrazolo[3,4-*b*]quinolines

Bo Jiang,<sup>a</sup> Ge Zhang,<sup>a</sup> Ning Ma,<sup>a</sup> Feng Shi,<sup>a</sup> Shu-Jiang Tu,<sup>\*a</sup> Parminder Kaur<sup>b</sup> and

Guigen Li<sup>\*b</sup>

<sup>a</sup>School of Chemistry and Chemical Engineering, Xuzhou Normal University, Xuzhou, 221116, Jiangsu, P. R. China, and <sup>b</sup>Department of Chemistry and Biochemistry, Texas Tech University, Lubbock, TX 79409-1061. USA

laotu@xznu.edu.cn; guigen.li@ttu.edu

## Supporting Information

|                                                                                              |       |
|----------------------------------------------------------------------------------------------|-------|
| General information-----                                                                     | 1     |
| General procedure for the synthesis of compounds <b>4a</b> , <b>5a</b> , and <b>6a</b> ----- | 1     |
| X-ray Crystallography Structure of Compound <b>4h</b> -----                                  | 2     |
| Characterization Data of Compounds <b>4a-4k</b> -----                                        | 3-6   |
| Characterization Data of Compounds <b>5a-5k</b> -----                                        | 6-8   |
| Characterization Data of Compounds <b>6a-6h</b> -----                                        | 8-10  |
| Copies of <sup>1</sup> H and <sup>13</sup> C NMR Spectra for Compounds <b>4a-4k</b> -----    | 11-21 |
| Copies of <sup>1</sup> H and <sup>13</sup> C NMR Spectra for Compounds <b>5a-5k</b> -----    | 22-32 |
| Copies of <sup>1</sup> H NMR Spectra for Compounds <b>6a-6h</b> -----                        | 33-36 |
| -----                                                                                        |       |
| -----                                                                                        |       |
| -----                                                                                        |       |

## 1. General information

Microwave irradiation was carried out with microwave oven Emrys Creator from Personal Chemistry, Uppsala, Sweden.

## 2. General procedure for the synthesis of compounds **4a**, **5a**, and **6a**

**Preparation of compounds **4a** or **5a****, Microwave Heating: 4-Fluorobenzaldehyde **1a** (1.0 mmol) was introduced in a 10-mL Emrys reaction vial, and 2-hydroxy-1,4-naphthoquinone **2** (1.0 mmol), 3-methyl-1-phenyl-1*H*-pyrazol-5-amine **3a** or (3-methyl-isoxazol-5-amine **3b**) (1.1 mmol) and HOAc (1.5 mL) were then successively added. Subsequently, the reaction vial was capped and then stirred for 20 s. The mixture was irradiated (initial power 100 W and maximum power 200 W) at 120 °C until TLC (petroleum ether/acetone, 4:1 v/v) revealed that conversion of the starting material **1a** was complete (10 min or 12 min). The reaction mixture was then cooled to room temperature and diluted with cold water (40 mL). The solid product was collected by Büchner filtration and was purified by flash column chromatography (silica gel, mixtures of petroleum ether/ethyl acetate, 5:1 v/v) to afford the desired pure products **4a** (or **5a**) as a red solid.

**Preparation of compounds **6a****: In a 10-mL Emrys<sup>TM</sup> reaction vial, quinoxaline-fused benzo[*h*]isoxazolo[5,4-*b*]quinolines **5a** and benzene-1,2-diamine (**7**, 1.1 mmol) and DMF (2.5 mL) were mixed and capped, and then stirred for 20 s. The mixture was irradiated for a given time at 120 °C under microwave irradiation (initial power 100 W and maximum power 250 W). When the reaction was completed (monitored by TLC). The reaction mixture was then cooled to room temperature and diluted with cold water (40 mL). The solid product was collected by

Büchner filtration and was purified by recrystallization from 95% EtOH to afford the desired pure products **6a** as a pale yellow solid.

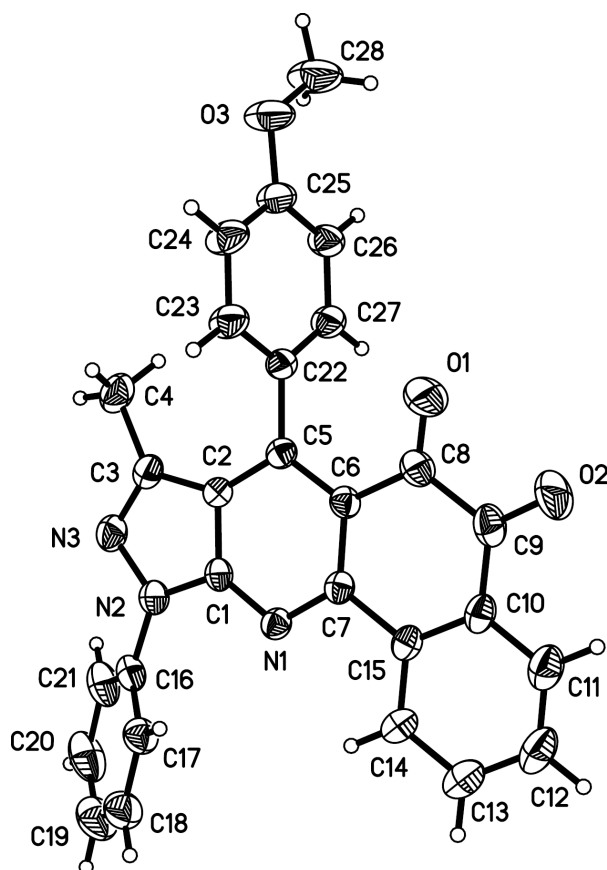

**X-ray Crystallographic Structure of Compound 4h**

**7-(4-Fluorophenyl)-8-methyl-10-phenyl-5H-benzo[h]pyrazolo[3,4-b]quinoline-5,6(10H)-dione (4a)**

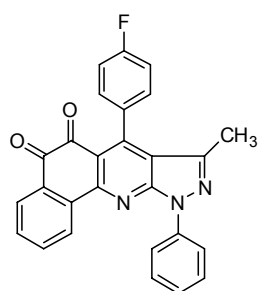

Red solid, mp: >300 °C

$^1\text{H}$  NMR (400 MHz, DMSO- $d_6$ ) ( $\delta$ , ppm): 8.76 (d,  $J$  = 8.0 Hz, 1H, ArH), 8.30 (d,  $J$  = 7.6 Hz, 2H, ArH), 8.05 (d,  $J$  = 7.2 Hz, 1H, ArH), 7.95 (t,  $J$  = 7.6 Hz, 1H, ArH), 7.72 (d,  $J$  = 7.6 Hz, 1H, ArH), 7.67 (t,  $J$  = 8.0 Hz, 2H, ArH), 7.46-7.36 (m, 5H, ArH), 1.89 (s, 3H, CH<sub>3</sub>).

$^{13}\text{C}$  NMR (100 MHz, DMSO- $d_6$ , 25 °C) ( $\delta$ , ppm): 179.19, 153.28, 145.50, 138.23, 136.57, 135.62, 132.50, 131.94, 131.42, 129.64, 129.57, 129.45, 128.15, 128.13, 127.12, 126.56, 126.48, 120.79, 116.25, 115.12, 114.90, 14.23.

IR (KBr,  $\nu$ , cm<sup>-1</sup>): 3073, 1680, 1559, 1509, 1419, 1382, 1286, 1217, 1159, 1087, 947, 840, 773, 693, 647.

HRMS (ESI)  $m/z$ : calc. for C<sub>27</sub>H<sub>16</sub>FN<sub>3</sub>O<sub>2</sub>Na: 456.1119, found: 456.1119.

**7-(2-Chlorophenyl)-8-methyl-10-phenyl-5H-benzo[h]pyrazolo[3,4-b]quinoline-5,6(10H)-dione (4b)**

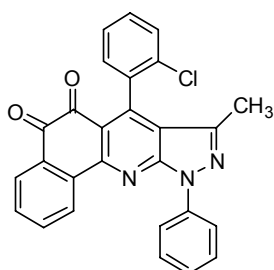

Red solid, mp: 262-263 °C

$^1\text{H}$  NMR (400 MHz, DMSO- $d_6$ ) ( $\delta$ , ppm): 8.79 (d,  $J$  = 8.0 Hz, 1H, ArH), 8.31 (d,  $J$  = 7.6 Hz, 2H, ArH), 8.06 (d,  $J$  = 8.0 Hz, 1H, ArH), 7.97 (t,  $J$  = 7.6 Hz, 1H, ArH), 7.75-7.66 (m, 4H, ArH), 7.58 (t,  $J$  = 7.0 Hz, 1H, ArH), 7.52 (t,  $J$  = 7.8 Hz, 1H, ArH), 7.45 (t,  $J$  = 7.6 Hz, 1H, ArH), 7.37 (dd,  $J_1$  = 7.6 Hz,  $J_2$  = 1.2 Hz, 1H, ArH), 1.87 (s, 3H, CH<sub>3</sub>).

$^{13}\text{C}$  NMR (100 MHz, DMSO- $d_6$ , 25 °C) ( $\delta$ , ppm): 178.72, 153.51, 145.21, 138.15,

136.36, 135.64, 135.36, 132.04, 131.57, 130.87, 130.01, 129.48, 128.97, 128.90, 128.29, 127.23, 126.60, 126.52, 120.87, 120.35, 115.68, 13.09.

IR (KBr,  $\nu$ , cm<sup>-1</sup>): 3066, 1681, 1595, 1557, 1488, 1383, 1288, 1216, 1133, 1030, 948, 745, 689, 639.

HRMS (ESI)  $m/z$ : calc. for C<sub>27</sub>H<sub>16</sub>ClN<sub>3</sub>O<sub>2</sub>Na: 472.0824, found: 472.0801.

**7-(3-Bromophenyl)-8-methyl-10-phenyl-5H-benzo[h]pyrazolo[3,4-b]quinoline-5,6(10H)-dione (4c)**

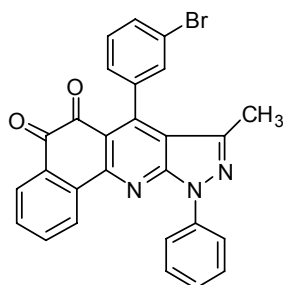

Red solid, mp: >300 °C

$^1\text{H}$  NMR (400 MHz, DMSO- $d_6$ ) ( $\delta$ , ppm): 8.77 (d,  $J$  = 8.0 Hz, 1H, ArH), 8.30 (d,  $J$  = 8.0 Hz, 2H, ArH), 8.06 (d,  $J$  = 7.6 Hz, 1H, ArH), 7.96 (t,  $J$  = 7.6 Hz, 1H, ArH), 7.75-7.63 (m, 5H, ArH), 7.52 (t,  $J$  = 7.8 Hz, 1H, ArH), 7.44 (t,  $J$  = 7.2 Hz, 2H, ArH), 1.90 (s, 3H, CH<sub>3</sub>).

$^{13}\text{C}$  NMR (100 MHz, DMSO- $d_6$ , 25 °C) ( $\delta$ , ppm): 178.44, 153.23, 149.74, 148.47, 145.34, 138.66, 138.19, 135.62, 131.96, 131.47, 130.87, 130.21, 129.84, 129.47, 129.37, 128.20, 126.58, 126.52, 121.24, 120.80, 120.48, 110.62, 14.20.

IR (KBr,  $\nu$ , cm<sup>-1</sup>): 3075, 1678, 1666, 1555, 1487, 1420, 1381, 1287, 1215, 1129, 1087, 949, 752, 688, 646.

HRMS (ESI)  $m/z$ : calc. for C<sub>27</sub>H<sub>16</sub>BrN<sub>3</sub>O<sub>2</sub>Na: 516.0319, found: 516.0287.

**8-Methyl-7-(3-nitrophenyl)-10-phenyl-5H-benzo[h]pyrazolo[3,4-b]quinoline-5,6(10H)-dione (4d)**

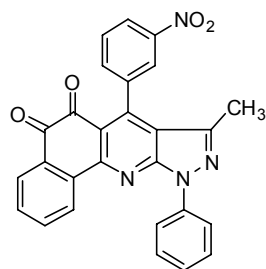

Red solid, mp: >300 °C

$^1\text{H}$  NMR (400 MHz, DMSO- $d_6$ ) ( $\delta$ , ppm): 8.78 (d,  $J$  = 7.6 Hz, 1H, ArH), 8.43-8.40 (m, 1H, ArH), 8.31-8.29 (m, 3H, ArH), 8.07 (d,  $J$  = 7.2 Hz, 1H, ArH), 7.99-7.85 (m, 3H, ArH), 7.75-7.66 (m, 3H, ArH), 7.44 (t,  $J$  = 7.4 Hz, 1H, ArH), 1.88 (s, 3H, CH<sub>3</sub>).

$^{13}\text{C}$  NMR (100 MHz, DMSO- $d_6$ , 25 °C) ( $\delta$ , ppm): 178.79, 178.35, 153.23, 147.53, 147.39, 145.21, 138.16, 138.09, 136.37, 135.59, 134.29, 132.02, 131.52, 129.81, 129.50, 128.21, 126.53, 122.99, 122.48, 120.81, 120.66, 115.85, 14.44.

IR (KBr,  $\nu$ , cm<sup>-1</sup>): 3074, 1680, 1558, 1527, 1419, 1347, 1287, 1216, 1087, 953, 757, 690, 640.

HRMS (ESI)  $m/z$ : calc. for  $C_{27}H_{16}N_4O_4Na$ : 483.1064, found: 483.1058.

**7-(4-Hydroxy-3-nitrophenyl)-8-methyl-10-phenyl-5H-benzo[h]pyrazolo[3,4-b]quinoline-5,6(10H)-dione (4e)**

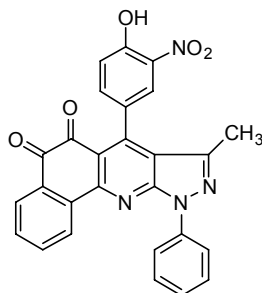

Red solid, mp: >300 °C

$^1H$  NMR (400 MHz,  $DMSO-d_6$ ) ( $\delta$ , ppm): 11.36 (s, 1H, OH), 8.76 (d,  $J = 7.6$  Hz, 1H, ArH), 8.29 (d,  $J = 7.6$  Hz, 2H, ArH), 8.06 (d,  $J = 7.6$  Hz, 1H, ArH), 7.96-7.93 (m, 2H, ArH), 7.73-7.65 (m, 3H, ArH), 7.60 (dd,  $J_1 = 8.8$  Hz,  $J_2 = 2.4$  Hz, 1H, ArH), 7.43 (t,  $J = 7.4$  Hz, 1H, ArH), 7.30 (d,  $J = 8.4$  Hz, 1H, ArH), 2.00 (s, 3H,  $CH_3$ ).

$^{13}C$  NMR (100 MHz,  $DMSO-d_6$ , 25 °C) ( $\delta$ , ppm): 178.99, 178.58, 153.17, 151.99, 149.74, 147.92, 145.31, 138.17, 136.50, 136.42, 135.57, 134.66, 131.80, 131.42, 129.38, 128.13, 126.91, 126.51, 126.40, 124.35, 120.77, 120.61, 118.87, 116.22,

112.71, 14.58.

IR (KBr,  $\nu$ ,  $cm^{-1}$ ): 3241, 3077, 1680, 1629, 1583, 1489, 1419, 1325, 1289, 1215, 1177, 1085, 954, 836, 759, 689, 630.

HRMS (ESI)  $m/z$ : calc. for  $C_{27}H_{16}N_4O_5Na$ : 499.1013, found: 499.0989.

**8-Methyl-7,10-diphenyl-5H-benzo[h]pyrazolo[3,4-b]quinoline-5,6(10H)-dione (4f)**

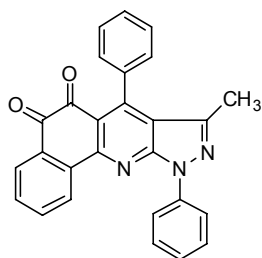

Red solid, mp: 278-279 °C

$^1H$  NMR (400 MHz,  $DMSO-d_6$ ) ( $\delta$ , ppm): 8.76 (d,  $J = 7.6$  Hz, 1H, ArH), 8.29 (d,  $J = 7.6$  Hz, 2H, ArH), 8.04 (dd,  $J_1 = 7.6$  Hz,  $J_2 = 1.2$  Hz, 1H, ArH), 7.96-7.92 (m, 1H, ArH), 7.72-7.64 (m, 3H, ArH), 7.54-7.52 (m, 3H, ArH), 7.42 (t,  $J = 7.4$  Hz, 1H, ArH), 7.38-7.36 (m, 2H, ArH), 1.82 (s, 3H,  $CH_3$ ).

$^{13}C$  NMR (100 MHz,  $DMSO-d_6$ , 25 °C) ( $\delta$ , ppm): 179.23, 178.63, 153.27, 150.69, 145.58, 138.26, 136.62, 136.31, 135.59, 131.95, 131.38, 129.43, 128.14, 127.97,

127.25, 126.55, 126.43, 120.76, 120.52, 116.18, 13.99.

IR (KBr,  $\nu$ ,  $cm^{-1}$ ): 3065, 2924, 1679, 1666, 1555, 1490, 1417, 1382, 1287, 1216, 1164, 1086, 947, 864, 756, 690, 640, 579.

HRMS (ESI)  $m/z$ : calc. for  $C_{27}H_{17}N_3O_2Na$ : 438.1213, found: 438.1203.

**8-Methyl-10-phenyl-7-p-tolyl-5H-benzo[h]pyrazolo[3,4-b]quinoline-5,6(10H)-dione (4g)**

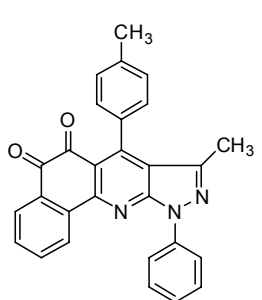

Red solid, mp: >300 °C

$^1H$  NMR (400 MHz,  $DMSO-d_6$ ) ( $\delta$ , ppm): 8.72 (d,  $J = 8.0$  Hz, 1H, ArH), 8.28 (d,  $J = 8.4$  Hz, 2H, ArH), 8.01 (d,  $J = 7.6$  Hz, 1H, ArH), 7.92 (t,  $J = 7.8$  Hz, 1H, ArH), 7.70-7.62 (m, 3H, ArH), 7.41 (t,  $J = 7.4$  Hz, 1H, ArH), 7.33 (d,  $J = 7.6$  Hz, 2H, ArH), 7.24 (d,  $J = 8.0$  Hz, 2H, ArH), 2.45 (s, 3H,  $CH_3$ ), 1.84 (s, 3H,  $CH_3$ ).

$^{13}C$  NMR (100 MHz,  $DMSO-d_6$ , 25 °C) ( $\delta$ , ppm): 179.30, 178.74, 153.24, 149.67, 145.63, 144.76, 138.26, 137.20, 136.62, 135.56, 133.29, 131.90, 131.34, 129.42, 128.53, 128.09, 127.26, 126.54, 126.38, 120.70, 116.27, 21.00, 14.19.

IR (KBr,  $\nu$ ,  $cm^{-1}$ ): 3028, 2918, 1682, 1642, 1555, 1447, 1382, 1286, 1218, 1154, 1021, 922, 821, 768, 692, 645.

HRMS (ESI)  $m/z$ : calc. for  $C_{28}H_{19}N_3O_2Na$ : 452.1369, found: 452.1354.

**7-(4-Methoxyphenyl)-8-methyl-10-phenyl-5H-benzo[h]pyrazolo[3,4-b]quinoline-5,6(10H)-dione (4h)**

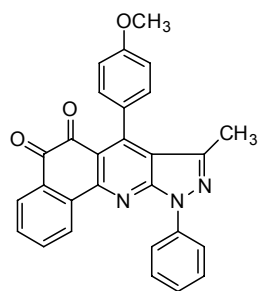

Red solid, mp: 283-284 °C

$^1\text{H}$  NMR (400 MHz, DMSO- $d_6$ ) ( $\delta$ , ppm): 8.74 (d,  $J$  = 8.0 Hz, 1H, ArH), 8.29 (d,  $J$  = 8.0 Hz, 2H, ArH), 8.01 (d,  $J$  = 7.6 Hz, 1H, ArH), 7.93 (t,  $J$  = 7.8 Hz, 1H, ArH), 7.71-7.63 (m, 3H, ArH), 7.42 (t,  $J$  = 7.4 Hz, 1H, ArH), 7.31 (d,  $J$  = 8.4 Hz, 2H, ArH), 7.08 (d,  $J$  = 8.8 Hz, 2H, ArH), 3.87 (s, 3H, OCH<sub>3</sub>), 1.90 (s, 3H, CH<sub>3</sub>).

$^{13}\text{C}$  NMR (100 MHz, DMSO- $d_6$ , 25 °C) ( $\delta$ , ppm): 179.43, 178.92, 159.15, 153.26, 149.72, 145.68, 138.29, 136.68, 131.88, 131.33, 129.42, 128.90, 128.10, 126.56, 126.39, 120.89, 120.73, 116.48, 113.42, 111.72, 55.16, 14.38.

IR (KBr,  $\nu$ ,  $\text{cm}^{-1}$ ): 3063, 2935, 2838, 1681, 1642, 1608, 1555, 1442, 1382, 1289, 1248, 1176, 1029, 947, 829, 766, 691, 646.

HRMS (ESI)  $m/z$ : calc. for C<sub>28</sub>H<sub>19</sub>N<sub>3</sub>O<sub>3</sub>Na: 468.1319, found: 468.1327.

#### 7-(Benzo[d][1,3]dioxol-5-yl)-8-methyl-10-phenyl-5H-benzo[h]pyrazolo[3,4-b]quinoline-5,6(10H)-dione (4i)

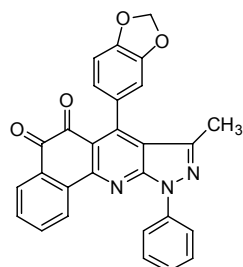

Red solid, mp: >300 °C

$^1\text{H}$  NMR (400 MHz, DMSO- $d_6$ ) ( $\delta$ , ppm): 8.76 (d,  $J$  = 7.6 Hz, 1H, ArH), 8.30 (d,  $J$  = 7.6 Hz, 2H, ArH), 8.05 (d,  $J$  = 7.2 Hz, 1H, ArH), 7.97-7.93 (m, 1H, ArH), 7.73-7.65 (m, 3H, ArH), 7.43 (t,  $J$  = 7.6 Hz, 1H, ArH), 7.08 (d,  $J$  = 7.6 Hz, 1H, ArH), 6.98 (s, 1H, ArH), 6.85 (dd,  $J_1$  = 8.0 Hz,  $J_2$  = 1.6 Hz, 1H, ArH), 6.16 (d,  $J$  = 10.0 Hz, 2H, CH<sub>2</sub>), 2.01 (s, 3H, CH<sub>3</sub>).

$^{13}\text{C}$  NMR (100 MHz, DMSO- $d_6$ , 25 °C) ( $\delta$ , ppm): 179.34, 178.77, 153.21, 150.39,

147.17, 147.05, 145.64, 138.26, 136.63, 135.61, 131.84, 131.37, 129.57, 129.41, 128.11, 126.55, 126.39, 121.03, 120.91, 120.71, 116.37, 108.39, 108.04, 101.21, 14.34.

IR (KBr,  $\nu$ ,  $\text{cm}^{-1}$ ): 3070, 2928, 1681, 1556, 1491, 1440, 1337, 1239, 1214, 1037, 935, 807, 770, 694.

HRMS (ESI)  $m/z$ : calc. for C<sub>28</sub>H<sub>17</sub>N<sub>3</sub>O<sub>4</sub>Na: 482.1112, found: 482.1075.

#### 8-Methyl-10-phenyl-7-(thiophen-2-yl)-5H-benzo[h]pyrazolo[3,4-b]quinoline-5,6(10H)-dione (4j)

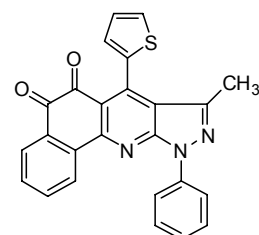

Red solid, mp: 271-273 °C

$^1\text{H}$  NMR (400 MHz, DMSO- $d_6$ ) ( $\delta$ , ppm): 8.71 (d,  $J$  = 7.6 Hz, 1H, ArH), 8.27 (d,  $J$  = 7.6 Hz, 2H, ArH), 8.03 (dd,  $J_1$  = 8.0 Hz,  $J_2$  = 1.2 Hz, 1H, ArH), 7.93-7.89 (m, 1H, ArH), 7.84 (dd,  $J_1$  = 5.2 Hz,  $J_2$  = 1.2 Hz, 1H, ArH), 7.67-7.63 (m, 3H, ArH), 7.42 (t,  $J$  = 7.4 Hz, 1H, Thienyl-H), 7.26-7.24 (m, 1H, Thienyl-H), 7.15 (dd,  $J_1$  = 3.6 Hz,  $J_2$  = 1.2 Hz, 1H, Thienyl-H), 1.99 (s, 3H, CH<sub>3</sub>).

$^{13}\text{C}$  NMR (100 MHz, DMSO- $d_6$ , 25 °C) ( $\delta$ , ppm): 179.04, 178.28, 153.30, 145.50, 138.19, 136.45, 135.53, 135.30, 131.93, 131.40, 129.41, 129.25, 128.11, 127.49, 127.35, 126.97, 126.55, 126.50, 120.86, 120.73, 119.54, 117.48, 13.38.

IR (KBr,  $\nu$ ,  $\text{cm}^{-1}$ ): 3046, 2919, 1678, 1635, 1569, 1491, 1378, 1283, 1158, 1084, 925, 816, 756, 690, 640.

HRMS (ESI)  $m/z$ : calc. for C<sub>25</sub>H<sub>15</sub>N<sub>3</sub>O<sub>2</sub>SNa: 444.0778, found: 444.0763.

#### 7-Butyl-8-methyl-10-phenyl-5H-benzo[h]pyrazolo[3,4-b]quinoline-5,6(10H)-dione (4k)

Red solid, mp: 192-194 °C

$^1\text{H}$  NMR (400 MHz, DMSO- $d_6$ ) ( $\delta$ , ppm): 8.60 (d,  $J$  = 8.0 Hz, 1H, ArH), 8.23 (d,  $J$  = 7.6 Hz, 2H, ArH), 7.99 (d,  $J$  = 7.6 Hz, 1H, ArH), 7.86 (t,  $J$  = 7.6 Hz, 1H, ArH), 7.67-7.60 (m, 3H, ArH), 7.40 (t,  $J$  = 7.4 Hz, 1H, ArH),

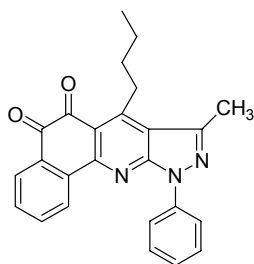

2.72 (s, 3H, CH<sub>3</sub>), 1.62-1.55 (m, 4H, 2CH<sub>2</sub>), 1.00 (t, *J* = 7.0 Hz, 3H, CH<sub>3</sub>).

<sup>13</sup>C NMR (100 MHz, DMSO-*d*<sub>6</sub>, 25 °C) ( $\delta$ , ppm): 179.82, 178.99, 155.95, 153.69, 149.76, 145.23, 138.23, 136.71, 135.49, 131.52, 131.21, 129.32, 127.97, 126.50, 126.31, 120.68, 116.19, 112.71, 31.96, 29.83, 22.83, 15.52, 13.61.

IR (KBr,  $\nu$ , cm<sup>-1</sup>): 3080, 2961, 2928, 2854, 1696, 1672, 1660, 1564, 1490, 1417, 1378, 1289, 1216, 1165, 1089, 965, 762, 693, 636.

HRMS (ESI) *m/z*: calc. for C<sub>25</sub>H<sub>21</sub>N<sub>3</sub>O<sub>2</sub>Na: 418.1526, found: 418.1497.

#### 7-(4-Fluorophenyl)-8-methylbenzo[h]isoxazolo[5,4-b]quinoline-5,6-dione (5a)

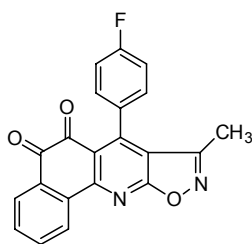

Red solid, mp: 262-264 °C

<sup>1</sup>H NMR (400 MHz, DMSO-*d*<sub>6</sub>) ( $\delta$ , ppm): 8.72 (d, *J* = 8.0 Hz, 1H, ArH), 8.06 (d, *J* = 7.6 Hz, 1H, ArH), 7.93 (t, *J* = 7.2 Hz, 1H, ArH), 7.74 (t, *J* = 7.6 Hz, 1H, ArH), 7.48-7.44 (m, 2H, ArH), 7.18 (t, *J* = 9.2 Hz, 2H, ArH), 1.89 (s, 3H, CH<sub>3</sub>).

IR (KBr,  $\nu$ , cm<sup>-1</sup>): 3069, 1692, 1672, 1573, 1510, 1442, 1341, 1219, 1162, 1076, 936, 842, 774, 611.

<sup>13</sup>C NMR (100 MHz, DMSO-*d*<sub>6</sub>, 25 °C) ( $\delta$ , ppm): 178.44, 178.11, 169.04, 163.45, 161.01, 157.21, 155.32, 151.12, 135.56, 132.18, 131.99, 129.78, 129.70, 128.27, 126.83, 123.32, 115.17, 114.96, 113.33, 11.98.

HRMS (ESI) *m/z*: calc. for C<sub>21</sub>H<sub>11</sub>FN<sub>2</sub>O<sub>3</sub>Na: 381.0646, found: 381.0640.

#### 7-(4-Chlorophenyl)-8-methylbenzo[h]isoxazolo[5,4-b]quinoline-5,6-dione (5b)

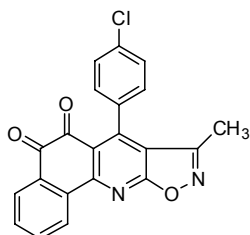

Red solid, mp: 260-262 °C

<sup>1</sup>H NMR (400 MHz, DMSO-*d*<sub>6</sub>) ( $\delta$ , ppm): 8.73 (d, *J* = 8.0 Hz, 1H, ArH), 8.07 (d, *J* = 7.2 Hz, 1H, ArH), 7.93 (t, *J* = 8.0 Hz, 1H, ArH), 7.74 (t, *J* = 7.6 Hz, 1H, ArH), 7.61 (d, *J* = 8.4 Hz, 2H, ArH), 7.44 (d, *J* = 8.4 Hz, 2H, ArH), 1.90 (s, 3H, CH<sub>3</sub>).

IR (KBr,  $\nu$ , cm<sup>-1</sup>): 3072, 1684, 1671, 1571, 1492, 1346, 1274, 1089, 1020, 937, 829, 771, 631, 595.

<sup>13</sup>C NMR (100 MHz, DMSO-*d*<sub>6</sub>, 25 °C) ( $\delta$ , ppm): 178.29, 177.97, 169.02, 157.15, 155.31, 150.67, 135.54, 133.94, 133.28, 132.19, 132.01, 129.38, 128.28, 128.15, 126.80, 123.16, 113.09, 12.02.

HRMS (ESI) *m/z*: calc. for C<sub>21</sub>H<sub>11</sub>ClN<sub>2</sub>O<sub>3</sub>Na: 397.0350, found: 397.0323.

#### 7-(4-Bromophenyl)-8-methylbenzo[h]isoxazolo[5,4-b]quinoline-5,6-dione (5c)

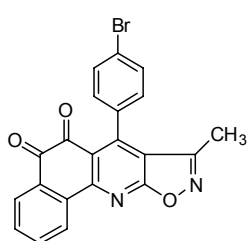

Red solid, mp: 264-265 °C

<sup>1</sup>H NMR (400 MHz, DMSO-*d*<sub>6</sub>) ( $\delta$ , ppm): 8.73 (d, *J* = 8.0 Hz, 1H, ArH), 8.07 (d, *J* = 8.0 Hz, 1H, ArH), 7.93 (t, *J* = 7.6 Hz, 1H, ArH), 7.76-7.73 (m, 3H, ArH), 7.37 (d, *J* = 8.4 Hz, 2H, ArH), 1.90 (s, 3H, CH<sub>3</sub>).

IR (KBr,  $\nu$ , cm<sup>-1</sup>): 3070, 2925, 1706, 1682, 1673, 1569, 1489, 1392, 1294, 1217, 1012, 936, 875, 770, 629.

<sup>13</sup>C NMR (100 MHz, DMSO-*d*<sub>6</sub>, 25 °C) ( $\delta$ , ppm): 178.29, 177.96, 169.03, 157.16, 155.34, 150.65, 135.53, 134.36, 132.02, 131.04, 129.62, 128.28, 126.81, 123.13, 121.87, 113.02, 12.05.

HRMS (ESI) *m/z*: calc. for C<sub>21</sub>H<sub>11</sub>BrN<sub>2</sub>O<sub>3</sub>Na: 440.9846, found: 440.9832.

#### 8-Methyl-7-(4-nitrophenyl)benzo[h]isoxazolo[5,4-b]quinoline-5,6-dione (5d)

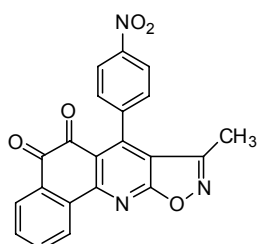

Red solid, mp: 268-269 °C

<sup>1</sup>H NMR (400 MHz, DMSO-*d*<sub>6</sub>) ( $\delta$ , ppm): 8.74 (d, *J* = 8.0 Hz, 1H, ArH), 8.41 (d, *J* = 8.8 Hz, 2H, ArH), 8.08 (d, *J* = 7.6 Hz, 1H, ArH), 7.94 (t, *J* = 8.0 Hz, 1H, ArH), 7.76 (t, *J* = 7.2 Hz, 1H, ArH), 7.71 (d, *J* = 8.8 Hz, 2H, ArH), 1.87 (s, 3H, CH<sub>3</sub>).

<sup>13</sup>C NMR (100 MHz, DMSO-*d*<sub>6</sub>, 25 °C) ( $\delta$ , ppm): 178.05, 177.72, 169.08, 157.01, 155.37, 149.39, 147.50, 142.30, 135.55, 135.41, 132.31, 132.11, 129.01, 128.34,

126.80, 123.28, 122.98, 112.77, 12.00.

IR (KBr,  $\nu$ ,  $\text{cm}^{-1}$ ): 1683, 1569, 1522, 1442, 1353, 1297, 1220, 1206, 1056, 976, 844, 777, 630, 591.

HRMS (ESI)  $m/z$ : calc. for  $\text{C}_{21}\text{H}_{11}\text{N}_3\text{O}_5\text{Na}$ : 408.0591, found: 408.0564.

### 8-Methyl-7-(3-nitrophenyl)benzo[*h*]isoxazolo[5,4-*b*]quinoline-5,6-dione (5e)

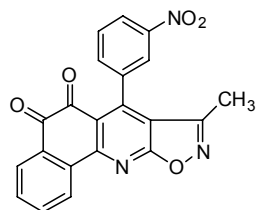

Red solid, mp: 236-237 °C

$^1\text{H}$  NMR (400 MHz,  $\text{DMSO-}d_6$ ) ( $\delta$ , ppm): 8.74 (d,  $J = 8.0$  Hz, 1H, ArH), 8.42-8.40 (m, 1H, ArH), 8.34-8.33 (m, 1H, ArH), 8.09 (d,  $J = 8.8$  Hz, 1H, ArH), 7.95-7.92 (m, 2H, ArH), 7.86 (t,  $J = 8.0$  Hz, 1H, ArH), 7.75 (t,  $J = 8.0$  Hz, 1H, ArH), 1.88 (s, 3H,  $\text{CH}_3$ ).

$^{13}\text{C}$  NMR (100 MHz,  $\text{DMSO-}d_6$ , 25 °C) ( $\delta$ , ppm): 178.09, 177.73, 169.04, 157.09, 155.26, 148.87, 147.50, 136.77, 135.54, 135.40, 134.21, 132.24, 132.08, 129.80,

128.32, 126.78, 123.32, 122.67, 113.16, 12.14.

IR (KBr,  $\nu$ ,  $\text{cm}^{-1}$ ): 3178, 3082, 1685, 1672, 1529, 1433, 1349, 1281, 1164, 974, 876, 731, 630.

HRMS (ESI)  $m/z$ : calc. for  $\text{C}_{21}\text{H}_{11}\text{N}_3\text{O}_5\text{Na}$ : 408.0591, found: 408.0569.

### 8-Methyl-7-phenylbenzo[*h*]isoxazolo[5,4-*b*]quinoline-5,6-dione (5f)

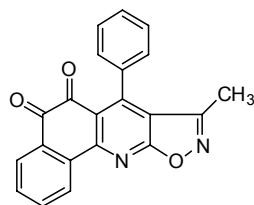

Red solid, mp: 270-271 °C

$^1\text{H}$  NMR (400 MHz,  $\text{DMSO-}d_6$ ) ( $\delta$ , ppm): 8.72 (d,  $J = 8.0$  Hz, 1H, ArH), 8.06 (d,  $J = 7.6$  Hz, 1H, ArH), 7.92 (t,  $J = 7.2$  Hz, 1H, ArH), 7.73 (t,  $J = 7.2$  Hz, 1H, ArH), 7.54-7.52 (m, 3H, ArH), 7.40-7.39 (m, 2H, ArH), 1.83 (s, 3H,  $\text{CH}_3$ ).

$^{13}\text{C}$  NMR (100 MHz,  $\text{DMSO-}d_6$ , 25 °C) ( $\delta$ , ppm): 178.49, 178.08, 169.05, 157.24, 155.34, 152.16, 135.66, 135.53, 135.07, 132.21, 131.95, 128.38, 128.26, 127.99,

127.30, 126.83, 123.11, 113.20, 11.74.

IR (KBr,  $\nu$ ,  $\text{cm}^{-1}$ ): 3058, 1685, 1672, 1570, 1445, 1345, 1274, 1219, 1057, 979, 879, 770, 697, 629.

HRMS (ESI)  $m/z$ : calc. for  $\text{C}_{21}\text{H}_{12}\text{N}_2\text{O}_3\text{Na}$ : 393.0741, found: 363.0750.

### 8-Methyl-7-*p*-tolylbenzo[*h*]isoxazolo[5,4-*b*]quinoline-5,6-dione (5g)

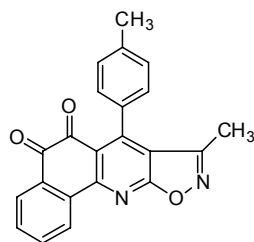

Red solid, mp: 250-251 °C

$^1\text{H}$  NMR (400 MHz,  $\text{DMSO-}d_6$ ) ( $\delta$ , ppm): 8.73 (d,  $J = 8.0$  Hz, 1H, ArH), 8.06 (d,  $J = 8.0$  Hz, 1H, ArH), 7.93 (t,  $J = 8.0$  Hz, 1H, ArH), 7.74 (t,  $J = 7.6$  Hz, 1H, ArH), 7.33 (d,  $J = 8.0$  Hz, 2H, ArH), 7.28 (d,  $J = 8.0$  Hz, 2H, ArH), 2.44 (s, 3H,  $\text{CH}_3$ ), 1.87 (s, 3H,  $\text{CH}_3$ ).

$^{13}\text{C}$  NMR (100 MHz,  $\text{DMSO-}d_6$ , 25 °C) ( $\delta$ , ppm): 178.64, 178.27, 169.07, 157.28,

155.34, 152.48, 137.76, 135.72, 135.54, 132.17, 132.07, 131.92, 128.55, 128.23, 127.35, 126.84, 123.28, 30.65, 20.98, 11.93.

IR (KBr,  $\nu$ ,  $\text{cm}^{-1}$ ): 1686, 1672, 1575, 1457, 1390, 1218, 1076, 825, 772, 611.

HRMS (ESI)  $m/z$ : calc. for  $\text{C}_{22}\text{H}_{14}\text{N}_2\text{O}_3\text{Na}$ : 377.0897, found: 377.0902.

### 7-(3,4-Dimethoxyphenyl)-8-methylbenzo[*h*]isoxazolo[5,4-*b*]quinoline-5,6-dione (5h)

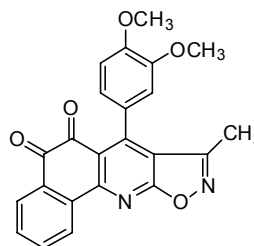

Red solid, mp: 246-248 °C

$^1\text{H}$  NMR (400 MHz,  $\text{DMSO-}d_6$ ) ( $\delta$ , ppm): 8.72 (d,  $J = 8.0$  Hz, 1H, ArH), 8.06 (d,  $J = 7.6$  Hz, 1H, ArH), 7.92 (t,  $J = 7.6$  Hz, 1H, ArH), 7.73 (t,  $J = 7.2$  Hz, 1H, ArH), 7.09 (d,  $J = 8.0$  Hz, 1H, ArH), 7.04 (s, 1H, ArH), 6.94 (dd,  $J_1 = 8.0$  Hz,  $J_2 = 1.6$  Hz, 1H, ArH), 3.86 (s, 3H,  $\text{OCH}_3$ ), 3.73 (s, 3H,  $\text{OCH}_3$ ), 1.96 (s, 3H,  $\text{CH}_3$ ).

$^{13}\text{C}$  NMR (100 MHz,  $\text{DMSO-}d_6$ , 25 °C) ( $\delta$ , ppm): 178.68, 178.28, 169.07, 157.44, 155.25, 152.34, 149.07, 148.41, 135.72, 135.55, 132.09, 131.91, 128.22, 127.12,



126.83, 123.46, 120.07, 113.37, 111.81, 111.31, 55.67, 55.58, 12.08.

IR (KBr,  $\nu$ ,  $\text{cm}^{-1}$ ): 3000, 2934, 2837, 1685, 1570, 1516, 1463, 1344, 1260, 1042, 874, 763, 636.

HRMS (ESI)  $m/z$ : calc. for  $\text{C}_{23}\text{H}_{16}\text{N}_2\text{O}_5\text{Na}$ : 423.0952, found: 423.0952.

#### 7-(Benzo[d][1,3]dioxol-5-yl)-8-methylbenzo[h]isoxazolo[5,4-b]quinoline-5,6-dione (5i)

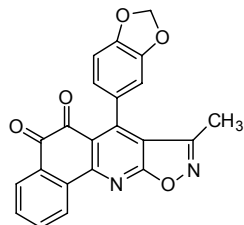

Red solid, mp: 284-285 °C

$^1\text{H}$  NMR (400 MHz,  $\text{DMSO-}d_6$ ) ( $\delta$ , ppm): 8.72 (d,  $J$  = 8.0 Hz, 1H, ArH), 8.06 (d,  $J$  = 8.0 Hz, 1H, ArH), 7.92 (t,  $J$  = 7.6 Hz, 1H, ArH), 7.74 (t,  $J$  = 6.8 Hz, 1H, ArH), 7.07 (d,  $J$  = 8.0 Hz, 1H, ArH), 6.99 (s, 1H, ArH), 6.89 (dd,  $J_1$  = 8.0 Hz,  $J_2$  = 1.6 Hz, 1H, ArH), 6.15 (d,  $J$  = 10.4 Hz, 2H,  $\text{CH}_2$ ), 2.00 (s, 3H,  $\text{CH}_3$ ).

$^{13}\text{C}$  NMR (100 MHz,  $\text{DMSO-}d_6$ , 25 °C) ( $\delta$ , ppm): 178.62, 178.26, 169.09, 157.33, 155.27, 151.89, 147.54, 147.07, 135.68, 135.57, 132.11, 131.94, 128.33, 128.24, 128.83, 123.51, 121.29, 113.36, 108.44, 108.03, 101.33, 12.11.

IR (KBr,  $\nu$ ,  $\text{cm}^{-1}$ ): 3073, 2894, 1684, 1673, 1591, 1571, 1436, 1345, 1237, 1117, 1037, 930, 874, 770, 632.

HRMS (ESI)  $m/z$ : calc. for  $\text{C}_{22}\text{H}_{12}\text{N}_2\text{O}_5\text{Na}$ : 407.0639, found: 407.0619.

#### 7-(4-(Dimethylamino)phenyl)-8-methylbenzo[h]isoxazolo[5,4-b]quinoline-5,6-dione (5j)

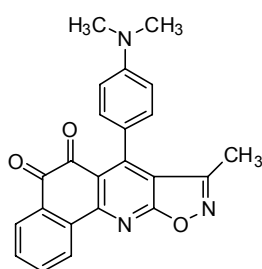

Red solid, mp: 270-271 °C

$^1\text{H}$  NMR (400 MHz,  $\text{DMSO-}d_6$ ) ( $\delta$ , ppm): 8.70 (d,  $J$  = 8.0 Hz, 1H, ArH), 8.04 (d,  $J$  = 7.6 Hz, 1H, ArH), 7.91 (t,  $J$  = 7.6 Hz, 1H, ArH), 7.72 (t,  $J$  = 7.6 Hz, 1H, ArH), 7.25 (d,  $J$  = 8.4 Hz, 2H, ArH), 6.82 (d,  $J$  = 8.8 Hz, 2H, ArH), 3.01 (d,  $J$  = 4.0 Hz, 6H, 2 $\text{CH}_3$ ), 2.00 (s, 3H,  $\text{CH}_3$ ).

$^{13}\text{C}$  NMR (100 MHz,  $\text{DMSO-}d_6$ , 25 °C) ( $\delta$ , ppm): 179.13, 178.89, 169.24, 157.42, 155.32, 153.53, 150.49, 135.89, 135.55, 132.00, 131.82, 129.18, 128.11, 126.86, 123.40, 121.53, 113.28, 111.13, 30.65, 12.51.

IR (KBr,  $\nu$ ,  $\text{cm}^{-1}$ ): 2890, 1687, 1572, 1529, 1435, 1354, 1271, 1199, 975, 811, 772, 633.

HRMS (ESI)  $m/z$ : calc. for  $\text{C}_{23}\text{H}_{18}\text{N}_3\text{O}_3$ : 384.1343, found: 384.1340.

#### 8-Methyl-7-(thiophen-2-yl)benzo[h]isoxazolo[5,4-b]quinoline-5,6-dione (5k)

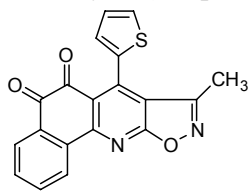

Red solid, mp: 207-208 °C

$^1\text{H}$  NMR (400 MHz,  $\text{DMSO-}d_6$ ) ( $\delta$ , ppm): 8.72 (d,  $J$  = 8.0 Hz, 1H, ArH), 8.07 (d,  $J$  = 7.6 Hz, 1H, ArH), 7.93 (t,  $J$  = 8.0 Hz, 1H, ArH), 7.85 (dd,  $J_1$  = 4.8 Hz,  $J_2$  = 1.2 Hz, 1H, Thienyl-H), 7.74 (t,  $J$  = 7.6 Hz, 1H, ArH), 7.25-7.23 (m, 1H, Thienyl-H), 7.21-7.20 (m, 1H, Thienyl-H), 2.00 (s, 3H,  $\text{CH}_3$ ).

$^{13}\text{C}$  NMR (100 MHz,  $\text{DMSO-}d_6$ , 25 °C) ( $\delta$ , ppm): 178.31, 177.66, 168.83, 157.25, 155.40, 145.12, 135.48, 133.93, 132.20, 132.00, 128.24, 128.18, 127.99, 126.98, 126.84, 124.32, 122.52, 114.16, 11.25

IR (KBr,  $\nu$ ,  $\text{cm}^{-1}$ ): 3074, 2927, 1686, 1573, 1432, 1389, 1295, 1205, 1076, 969, 772, 724.

HRMS (ESI)  $m/z$ : calc. for  $\text{C}_{19}\text{H}_{10}\text{N}_2\text{NaO}_3\text{S}$ : 369.0304, found: 369.0319.

#### Hexacyclic quinoxaline-fused benzo[h]pyrazolo[3,4-b]quinolines (6a)

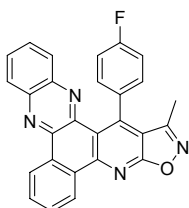

Pale yellow solid, mp: > 300 °C

$^1\text{H}$  NMR (400MHz,  $\text{DCCl}_3$ , 25 °C):  $\delta$  = 9.30-9.25 (m, 2H, ArH), 8.22 (d,  $J$  = 7.6 Hz, 1H, ArH), 7.85-7.77 (m, 3H, ArH), 7.71-7.67 (m, 1H, ArH), 7.39-7.28 (m, 5H, ArH), 2.04 (s, 3H,  $\text{CH}_3$ );

IR (KBr,  $\nu$ ,  $\text{cm}^{-1}$ ): 1590, 1569, 1509, 1419, 1383, 1322, 1221, 1126, 998, 810.

HRMS (ESI):  $m/z$  calcd for  $C_{27}H_{16}FN_4O$ : 431.1303, found: 431.1301.

#### Hexacyclic quinoxaline-fused benzo[*h*]pyrazolo[3,4-*b*]quinolines (6b)

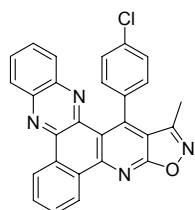

Pale yellow solid, mp: > 300 °C

$^1H$  NMR (400MHz,  $DCCl_3$ , 25 °C):  $\delta$  = 9.26 (d,  $J$  = 7.6 Hz, 2H, ArH), 8.22 (d,  $J$  = 8.4 Hz, 1H, ArH), 7.84-7.76 (m, 3H, ArH), 7.72-7.68 (m, 1H, ArH), 7.62-7.59 (m, 2H, ArH), 7.37-7.34 (m, 2H, ArH), 7.28-7.26 (m, 1H, ArH), 2.05 (s, 3H,  $CH_3$ );

IR (KBr,  $\nu$ ,  $cm^{-1}$ ): 1599, 1580, 1506, 1396, 1296, 1240, 1123, 1013, 767.

HRMS (ESI):  $m/z$  calcd for  $C_{27}H_{16}ClN_4O$ : 447.1007, found: 447.1013.

#### Hexacyclic quinoxaline-fused benzo[*h*]pyrazolo[3,4-*b*]quinolines (6c)

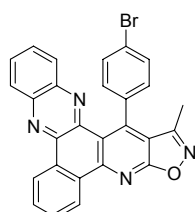

Pale yellow solid, mp: > 300 °C

$^1H$  NMR (400MHz,  $DCCl_3$ , 25 °C):  $\delta$  = 9.24 (d,  $J$  = 8.4 Hz, 2H, ArH), 8.21 (d,  $J$  = 7.6 Hz, 1H, ArH), 7.83-7.69 (m, 6H, ArH), 7.32-7.25 (m, 3H, ArH), 2.05 (s, 3H,  $CH_3$ ).

IR (KBr,  $\nu$ ,  $cm^{-1}$ ): 1602, 1579, 1485, 1394, 1350, 1312, 1223, 1125, 1014, 896.

HRMS (ESI):  $m/z$  calcd for  $C_{27}H_{16}BrN_4O$ : 491.0502, found: 491.0505.

#### Hexacyclic quinoxaline-fused benzo[*h*]pyrazolo[3,4-*b*]quinolines (6d)

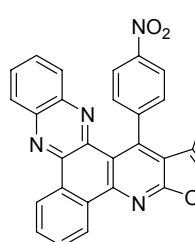

Pale yellow solid, mp: > 300 °C

$^1H$  NMR (400MHz,  $DCCl_3$ , 25 °C):  $\delta$  = 9.33-9.29 (m, 2H, ArH), 8.52 (d,  $J$  = 8.8 Hz, 2H, ArH), 8.24 (d,  $J$  = 8.4 Hz, 1H, ArH), 7.90-7.77 (m, 3H, ArH), 7.69-7.63 (m, 3H, ArH), 7.09 (d,  $J$  = 8.4 Hz, 1H, ArH), 2.02 (s, 3H,  $CH_3$ );

IR (KBr,  $\nu$ ,  $cm^{-1}$ ): 1673, 1596, 1579, 1519, 1483, 1392, 1341, 1222, 1076, 843.

HRMS (ESI):  $m/z$  calcd for  $C_{27}H_{16}N_5O_3$ : 458.1248, found: 458.1247.

#### Hexacyclic quinoxaline-fused benzo[*h*]pyrazolo[3,4-*b*]quinolines (6e)

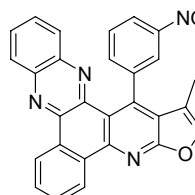

Pale yellow solid, mp: > 300 °C

$^1H$  NMR (400MHz,  $DCCl_3$ , 25 °C):  $\delta$  = 9.29-9.27 (m, 2H, ArH), 8.56 (d,  $J$  = 8.0 Hz, 1H, ArH), 8.37 (s, 1H, ArH), 8.23 (d,  $J$  = 8.4 Hz, 1H, ArH), 7.86-7.77 (m, 5H, ArH), 7.65 (t,  $J$  = 7.6 Hz, 1H, ArH), 7.08 (d,  $J$  = 8.4 Hz, 1H, ArH), 2.02 (s, 3H,  $CH_3$ );

IR (KBr,  $\nu$ ,  $cm^{-1}$ ): 1601, 1583, 1531, 1483, 1432, 1349, 1313, 1285, 1223, 1076, 771.

HRMS (ESI):  $m/z$  calcd for  $C_{27}H_{16}N_5O_3$ : 458.1248  $[M+H]^+$ , found: 458.1242.

#### Hexacyclic quinoxaline-fused benzo[*h*]pyrazolo[3,4-*b*]quinolines (6f)

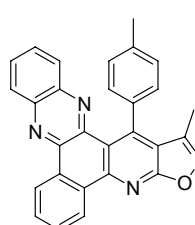

Pale yellow solid, mp: > 300 °C

$^1H$  NMR (400MHz,  $DCCl_3$ , 25 °C):  $\delta$  = 9.39-9.32 (m, 2H, ArH), 8.24 (d,  $J$  = 8.4 Hz, 1H, ArH), 7.90-7.86 (m, 2H, ArH), 7.78 (t,  $J$  = 7.6 Hz, 1H, ArH), 7.68-7.65 (m, 1H, ArH), 7.52-7.38 (m, 3H, ArH), 7.25-7.23 (m, 2H, ArH), 2.62 (s, 3H,  $CH_3$ ), 2.05 (s, 3H,  $CH_3$ );

IR (KBr,  $\nu$ ,  $cm^{-1}$ ): 1601, 1581, 1515, 1483, 1393, 1359, 1348, 1313, 1222, 1074, 824, 768.

HRMS (ESI):  $m/z$  calcd for  $C_{28}H_{19}N_4O$ : 427.1553, found: 427.1550.

#### Hexacyclic quinoxaline-fused benzo[*h*]pyrazolo[3,4-*b*]quinolines (6g)

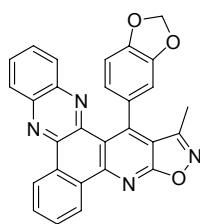

Pale yellow solid, mp: > 300 °C

$^1\text{H NMR}$  (400MHz,  $\text{DCCl}_3$ , 25 °C):  $\delta$  = 9.31-9.26 (m, 2H, ArH), 8.23 (d,  $J$  = 8.0 Hz, 1H, ArH), 7.85-7.77 (m, 3H, ArH), 7.72-7.69 (m, 1H, ArH), 7.41 (d,  $J$  = 7.6 Hz, 1H, ArH), 7.05 (d,  $J$  = 7.6 Hz, 1H, ArH), 6.88-6.81 (m, 2H, ArH), 6.17 (d,  $J$  = 13.6 Hz, 1H,  $\text{CH}_2$ ), 2.15 (s, 3H,  $\text{CH}_3$ );

IR (KBr,  $\nu$ ,  $\text{cm}^{-1}$ ): 1603, 1581, 1498, 1484, 1439, 1360, 1350, 1236, 1039, 922, 762.

HRMS (ESI):  $m/z$  calcd for  $\text{C}_{28}\text{H}_{17}\text{N}_4\text{O}_3$ : 457.1295  $[\text{M}+\text{H}]^+$ , found: 457.1280.

#### Hexacyclic quinoxaline-fused benzo[*h*]pyrazolo[3,4-*b*]quinolines (6h)

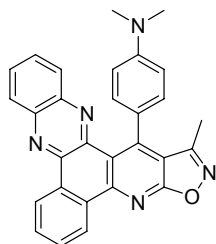

Pale yellow solid, mp: > 300 °C

$^1\text{H NMR}$  (400MHz,  $\text{DCCl}_3$ , 25 °C):  $\delta$  = 9.37-9.29 (m, 2H, ArH), 8.22 (d,  $J$  = 8.4 Hz, 1H, ArH), 7.89-7.85 (m, 2H, ArH), 7.79-7.75 (m, 1H, ArH), 7.68-7.64 (m, 1H, ArH), 7.37 (d,  $J$  = 8.4 Hz, 1H, ArH), 7.23 (d,  $J$  = 8.4 Hz, 2H, ArH), 6.96-6.95 (m, 2H, ArH), 3.15 (s, 6H,  $\text{CH}_3$ ), 2.11 (s, 3H,  $\text{CH}_3$ );

IR (KBr,  $\nu$ ,  $\text{cm}^{-1}$ ): 1612, 1602, 1578, 1523, 1481, 1439, 1389, 1359, 1348, 1225, 757.

HRMS (ESI):  $m/z$  calcd for  $\text{C}_{29}\text{H}_{22}\text{N}_5\text{O}$ : 456.1819, found: 456.1820.
